# Supplementary material for: From Natural Xanthones to Synthetic C-1 Aminated 3,4-Dioxygenated Xanthones as Optimized Antifouling Agents
Source: MDPI journal article supplement (doi:10.3390/md19110638), 2021-11-13
Supplement: s1 [file s1]

# From natural xanthenes to synthetic C-1 aminated 3,4-dioxygenated xanthenes as optimized antifouling agents

Diana I. S. P. Resende <sup>1,2,#</sup>, Joana R. Almeida <sup>1,#</sup>, Sandra Pereira <sup>1,3</sup>, Alexandre Campos <sup>1</sup>, Agostinho Lemos <sup>2</sup>, Jeffrey E. Plowman <sup>4</sup>, Ancy Thomas <sup>4</sup>, Stefan Clerens <sup>4,5,6</sup>, Vitor Vasconcelos <sup>1,3</sup>, Madalena Pinto <sup>1,2</sup>, Marta Correia-da-Silva <sup>1,2,\*</sup> and Emília Sousa <sup>1,2</sup>

<sup>1</sup> CIIMAR/CIMAR - Interdisciplinary Centre of Marine and Environmental Research, University of Porto, Terminal de Cruzeiros do Porto de Leixões, Avenida General, Norton de Matos S/N, 4450-208, Matosinhos, Portugal; joana.reis.almeida@gmail.com, sandra.c.pereira28@gmail.com, amocclix@gmail.com, vmvascon@fc.up.pt

<sup>2</sup> Laboratory of Organic and Pharmaceutical Chemistry, Department of Chemical Sciences, Faculty of Pharmacy, University of Porto, Rua Jorge Viterbo Ferreira, 228, 4050-313, Porto, Portugal; dresende@ff.up.pt, up201002662@ff.up.pt; madalenaakijjoa@gmail.com, esousaf.up.pt

<sup>3</sup> Department of Biology, Faculty of Sciences, University of Porto, Rua do Campo Alegre, 4069-007, Porto, Portugal

<sup>4</sup> AgResearch Ltd, 1365 Springs Rd, Lincoln 7674, New Zealand; Jeff.Plowman@agresearch.co.nz; Ancy.Thomas@agresearch.co.nz; Stefan.Clerens@agresearch.co.nz

<sup>5</sup> Biomolecular Interaction Centre, University of Canterbury, Christchurch, New Zealand

<sup>6</sup> Riddet Institute, Massey University, Palmerston North, New Zealand

\*Correspondence: m\_correiadasilva@ff.up.pt; Tel.: +351-220428689

# Both authors contributed equally to this work.

## Content

|                                                                                                                                                                                                                                                                                                                                                                                       |   |
|---------------------------------------------------------------------------------------------------------------------------------------------------------------------------------------------------------------------------------------------------------------------------------------------------------------------------------------------------------------------------------------|---|
| Figure S1. Concentration-response of antibacterial activity of the promising AF compounds 6 and 16 towards <i>Roseobacter litoralis</i> . (B: DMSO control; (C) penicillin-streptomycin-neomycin stabilized solution was used as positive control.....                                                                                                                                | 2 |
| Table S1: Relative abundance values of proteins differentially expressed between control and group exposed to compound 21, and statistical results (mixed model ANOVA, P-value <0.05) .....                                                                                                                                                                                           | 3 |
| Table S2: Relative abundance values of proteins differentially expressed between control and group exposed to compound 23, and statistical results (mixed model ANOVA, P-value <0.05) .....                                                                                                                                                                                           | 4 |
| Table S3: Functional analysis and enrichment of differentially expressed proteins identified in mussel plantigrade larvae. Only the GO category Biological Process is represented in the analysis. GO = gene ontology term; term_size = number of gene sequences related to the GO term in the database; effective_domain_size = total number of gene sequences in the database. .... | 6 |

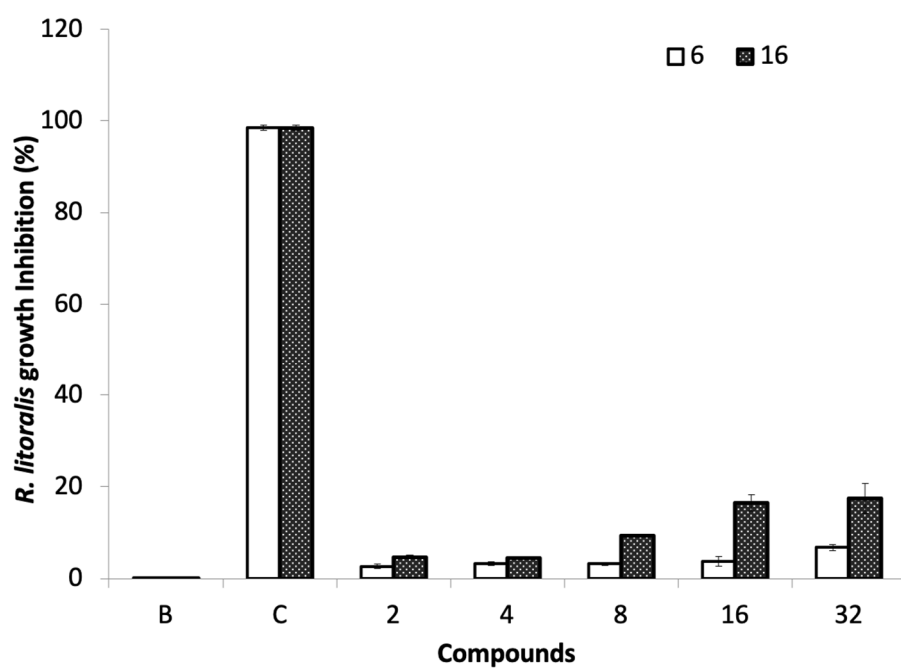

Figure S1. Concentration-response of antibacterial activity of the promising AF compounds 6 and 16 towards *Roseobacter litoralis*. (B: DMSO control; (C) penicillin-streptomycin-neomycin stabilized solution was used as positive control.

*Table S1: Relative abundance values of proteins differentially expressed between control and group exposed to compound 21, and statistical results (mixed model ANOVA, P-value <0.05)*

| Protein ID | Mean of log <sub>2</sub> (x+1)-transformed values |             | P-value | Description                                                                                   | Accession      |
|------------|---------------------------------------------------|-------------|---------|-----------------------------------------------------------------------------------------------|----------------|
|            | Control                                           | compound 21 |         |                                                                                               |                |
| 2          | 4,6084                                            | 4,4047      | 0,024   | beta-actin [Meretrix meretrix]                                                                | AEK81538.1     |
| 9          | 4,2412                                            | 4,0767      | 0,036   | retrograde protein of 51 kDa-like isoform X4 [Crassostrea virginica]                          | XP_022320110.1 |
| 7          | 4,3863                                            | 4,0840      | 0,000   | PREDICTED: tubulin beta chain [Priapulus caudatus]                                            | XP_014664190.1 |
| 11         | 4,3091                                            | 4,1307      | 0,013   | RecName: Full=Tropomyosin                                                                     | Q25457.1       |
| 20         | 3,5028                                            | 3,2405      | 0,001   | sodium/potassium-transporting ATPase subunit alpha-like [Crassostrea virginica]               | XP_022323941.1 |
| 15         | 4,2940                                            | 4,0813      | 0,014   | calponin-like protein [Mytilus galloprovincialis]                                             | BAB60813.1     |
| 30         | 4,1447                                            | 3,9373      | 0,003   | elongation factor 1 alpha [Mytilus galloprovincialis]                                         | BAD35019.1     |
| 61         | 4,7393                                            | 4,5857      | 0,022   | histone H2B [Mytilus edulis]                                                                  | CAD37816.1     |
| 52         | 4,9618                                            | 4,7927      | 0,021   | PREDICTED: histone H4 [Equus caballus]                                                        | XP_014590042.1 |
| 42         | 3,8546                                            | 3,6500      | 0,001   | PREDICTED: 14-3-3 protein zeta isoform X1 [Hyaella azteca]                                    | XP_018019106.1 |
| 122        | 3,8424                                            | 3,4942      | 0,000   | cyclophilin A isoform 2 [Ruditapes philippinarum]                                             | ACU83230.1     |
| 5          | 3,8240                                            | 3,5656      | 0,003   | pedal retractor muscle myosin heavy chain partial [Mytilus galloprovincialis]                 | CAB64663.1     |
| 18         | 3,7831                                            | 3,5213      | 0,001   | mitochondrial H+ ATPase a subunit [Pinctada fucata]                                           | ABJ51956.1     |
| 49         | 3,7566                                            | 3,5304      | 0,005   | myosin heavy chain isoform N [Anopheles sinensis]                                             | KFB49247.1     |
| 51         | 4,0110                                            | 3,7157      | 0,000   | arginine kinase-like protein-1 [Mytilus coruscus]                                             | AKS48144.1     |
| 109        | 3,2714                                            | 2,9889      | 0,007   | RNA-binding protein [Pinctada fucata]                                                         | ABP04054.1     |
| 35         | 3,8137                                            | 3,3956      | 0,000   | glyceraldehyde-3-phosphate dehydrogenase partial [Mytilus galloprovincialis]                  | AKZ2450.1      |
| 34         | 3,7198                                            | 3,3952      | 0,001   | pedal retractor muscle myosin heavy chain partial [Mytilus galloprovincialis]                 | CAB64663.1     |
| 95         | 4,2033                                            | 3,9771      | 0,000   | histone H1 [Venerupis corrugata]                                                              | ABV25915.1     |
| 116        | 3,6801                                            | 3,3590      | 0,001   | meprin A subunit alpha-like [Mizuhopecten yessoensis]                                         | XP_021356192.1 |
| 115        | 3,4571                                            | 3,2421      | 0,025   | PREDICTED: peroxiredoxin-6-like [Amphimedon queenslandica]                                    | XP_003388603.1 |
| 17         | 3,8551                                            | 3,6858      | 0,028   | pedal retractor muscle myosin heavy chain partial [Mytilus galloprovincialis]                 | CAB64663.1     |
| 82         | 3,5652                                            | 3,2784      | 0,000   | elongation factor 2-like [Crassostrea virginica]                                              | XP_022335104.1 |
| 40         | 3,4352                                            | 3,2845      | 0,032   | PREDICTED: alpha-actinin sarcomeric isoform X2 [Crassostrea gigas]                            | XP_011425356.1 |
| 23         | 3,5226                                            | 3,1429      | 0,000   | byssal HSP-like protein 1 [Mytilus coruscus]                                                  | ANN45953.1     |
| 14         | 3,8376                                            | 3,5327      | 0,000   | procollagen-proline dioxygenase beta subunit [Mytilus galloprovincialis]                      | AFM30917.1     |
| 74         | 3,7002                                            | 3,3308      | 0,000   | meprin A subunit alpha-like [Mizuhopecten yessoensis]                                         | XP_021356192.1 |
| 65         | 3,3452                                            | 2,9697      | 0,000   | PREDICTED: adenosylhomocysteinase A [Crassostrea gigas]                                       | XP_011412005.1 |
| 66         | 3,4001                                            | 3,2653      | 0,022   | uncharacterized protein LOC111134038 isoform X1 [Crassostrea virginica]                       | XP_022338516.1 |
| 91         | 3,4908                                            | 3,1630      | 0,000   | 40S ribosomal protein S14 [Mizuhopecten yessoensis]                                           | XP_021365459.1 |
| 24         | 3,6329                                            | 3,3272      | 0,002   | heat shock cognate 71 [Mytilus galloprovincialis]                                             | CAH04109.1     |
| 55         | 3,4341                                            | 3,1075      | 0,001   | ribosomal protein S8e partial [Mytilus trossulus]                                             | ALX27203.1     |
| 93         | 3,5417                                            | 3,0424      | 0,000   | PREDICTED: calcitriol-like [Lingula anatina]                                                  | XP_013397065.1 |
| 118        | 3,4992                                            | 3,2132      | 0,001   | cytosolic malate dehydrogenase [Mytilus galloprovincialis]                                    | AAZ79367.1     |
| 77         | 3,3442                                            | 3,0985      | 0,004   | PREDICTED: plastin-3 [Crassostrea gigas]                                                      | XP_011415779.2 |
| 10         | 3,4426                                            | 3,1885      | 0,007   | filamin-like protein-1 [Mytilus coruscus]                                                     | AKS48135.1     |
| 50         | 3,4594                                            | 3,1153      | 0,001   | PREDICTED: 14-3-3 protein epsilon isoform X1 [Ictalurus punctatus]                            | XP_017346722.1 |
| 21         | 3,5785                                            | 3,2910      | 0,001   | heat shock protein 90 [Mytilus galloprovincialis]                                             | CAJ85741.1     |
| 80         | 3,2985                                            | 3,0979      | 0,012   | PREDICTED: mitochondria-eating protein isoform X2 [Crassostrea gigas]                         | XP_011417414.1 |
| 70         | 3,2833                                            | 3,0558      | 0,007   | aldehyde dehydrogenase mitochondrial-like [Mizuhopecten yessoensis]                           | XP_021346041.1 |
| 78         | 3,5655                                            | 3,1869      | 0,000   | predicted protein [methanotrophic endosymbiont of Bathymodiolus azoricus (Menez Gwen)]        | SCN46548.1     |
| 39         | 3,5150                                            | 3,1624      | 0,000   | uncharacterized protein LOC111107057 isoform X2 [Crassostrea virginica]                       | XP_022297716.1 |
| 103        | 3,7262                                            | 3,3918      | 0,004   | mammalian ependymin-related protein 1-like [Mizuhopecten yessoensis]                          | XP_021339375.1 |
| 92         | 3,6673                                            | 3,3258      | 0,000   | voltage-dependent anion channel 2-like protein [Haliotis diversicolor]                        | ADI56517.1     |
| 48         | 3,5458                                            | 3,0795      | 0,001   | ribosomal protein [Mytilus galloprovincialis]                                                 | CAQ63458.1     |
| 99         | 3,1268                                            | 2,9581      | 0,011   | twitchin-like protein-1 [Mytilus coruscus]                                                    | AKS48140.1     |
| 106        | 3,4244                                            | 3,1177      | 0,000   | hypothetical protein LOTGIDRAFT_235900 [Lottia gigantea]                                      | XP_009066140.1 |
| 74         | 3,4207                                            | 3,2090      | 0,008   | fructose-bisphosphate aldolase-like [Crassostrea virginica]                                   | XP_022340550.1 |
| 101        | 3,2671                                            | 3,0932      | 0,012   | lamin Dm0-like [Mizuhopecten yessoensis]                                                      | XP_021357386.1 |
| 87         | 3,0554                                            | 2,6943      | 0,001   | adenyl cyclase-associated protein 1-like isoform X3 [Crassostrea virginica]                   | XP_022334187.1 |
| 56         | 3,2693                                            | 2,9994      | 0,003   | myosin heavy chain non-muscle-like isoform X4 [Mizuhopecten yessoensis]                       | XP_021350592.1 |
| 19         | 3,7421                                            | 3,4603      | 0,000   | ATP synthase subunit beta mitochondrial [Mizuhopecten yessoensis]                             | XP_021356377.1 |
| 67         | 3,9791                                            | 3,8292      | 0,030   | histone H2A.Z.2 [Mytilus galloprovincialis]                                                   | APR72375.1     |
| 119        | 3,2063                                            | 2,9276      | 0,007   | Phosphoenolpyruvate carboxykinase [GTP] [Crassostrea gigas]                                   | EKC27095.1     |
| 100        | 3,2320                                            | 2,9014      | 0,001   | elongation factor 1-gamma-like [Crassostrea virginica]                                        | XP_022332183.1 |
| 90         | 3,2416                                            | 2,8597      | 0,004   | citrate synthase mitochondrial-like [Mizuhopecten yessoensis]                                 | XP_021357329.1 |
| 105        | 3,0641                                            | 2,7813      | 0,034   | flotillin-1-like isoform X1 [Mizuhopecten yessoensis]                                         | XP_021361554.1 |
| 12         | 3,8573                                            | 3,5600      | 0,003   | tubulin alpha-1A chain [Mizuhopecten yessoensis]                                              | XP_021370666.1 |
| 123        | 3,6254                                            | 3,4409      | 0,002   | ubiquitin-40S ribosomal protein S27a [Crassostrea gigas]                                      | NP_001292281.1 |
| 53         | 3,1497                                            | 2,8956      | 0,006   | tubulin beta chain-like [Crassostrea gigas]                                                   | NP_001292292.1 |
| 144        | 3,8766                                            | 3,5641      | 0,004   | unknown                                                                                       |                |
| 86         | 2,7963                                            | 2,9463      | 0,047   | PREDICTED: laminin subunit gamma-1 [Crassostrea gigas]                                        | XP_011419247.1 |
| 249        | 3,1630                                            | 2,9970      | 0,012   | uncharacterized protein ZK1073.1-like isoform X4 [Crassostrea virginica]                      | XP_022335676.1 |
| 152        | 3,3320                                            | 3,0606      | 0,001   | PREDICTED: 40S ribosomal protein S3 [Crassostrea gigas]                                       | XP_011438308.1 |
| 54         | 3,4558                                            | 3,1287      | 0,001   | isocitrate dehydrogenase [Mytilus galloprovincialis]                                          | AFI56365.1     |
| 114        | 3,4954                                            | 3,1848      | 0,001   | uncharacterized protein LOC110457451 isoform X2 [Mizuhopecten yessoensis]                     | XP_021364413.1 |
| 200        | 3,0633                                            | 2,8996      | 0,006   | uncharacterized protein LOC11111285 isoform X1 [Crassostrea virginica]                        | XP_022303867.1 |
| 113        | 3,2925                                            | 3,0384      | 0,004   | PREDICTED: 60S ribosomal protein L11 [Biomphalaria glabrata]                                  | XP_013068480.1 |
| 162        | 2,8043                                            | 2,4909      | 0,001   | uncharacterized protein LOC110465734 isoform X2 [Mizuhopecten yessoensis]                     | XP_021377443.1 |
| 128        | 3,3487                                            | 3,0454      | 0,001   | cathepsin D [Pteria penguin]                                                                  | AEI58895.1     |
| 143        | 3,2502                                            | 2,7554      | 0,000   | 40S ribosomal protein S25-like [Mizuhopecten yessoensis]                                      | XP_021370373.1 |
| 71         | 2,9901                                            | 2,7168      | 0,015   | dolichyl-diphosphooligosaccharide-protein glycosyltransferase subunit 1-like [Mizuhopecten ye | XP_021341263.1 |
| 108        | 2,7362                                            | 2,4491      | 0,037   | hemicentin-1-like partial [Mizuhopecten yessoensis]                                           | XP_021352826.1 |
| 26         | 3,5214                                            | 3,1616      | 0,000   | protein disulfide-isomerase A3-like [Crassostrea virginica]                                   | XP_022329914.1 |
| 111        | 3,1931                                            | 3,0007      | 0,046   | small heat shock protein 22 [Mytilus galloprovincialis]                                       | AEP02967.1     |
| 137        | 3,4747                                            | 3,0260      | 0,000   | PREDICTED: peptidyl-prolyl cis-trans isomerase [Crassostrea gigas]                            | XP_011444269.1 |
| 156        | 3,0107                                            | 2,6969      | 0,005   | PREDICTED: major vault protein [Crassostrea gigas]                                            | XP_011432755.1 |
| 132        | 3,4018                                            | 3,1217      | 0,001   | malate dehydrogenase precursor [Nuccella lapillus]                                            | AAF27650.1     |
| 102        | 2,9632                                            | 2,7625      | 0,017   | twitchin [Mytilus galloprovincialis]                                                          | BAC00784.1     |
| 160        | 3,2879                                            | 2,9446      | 0,000   | PREDICTED: protein SET [Crassostrea gigas]                                                    | XP_011443579.1 |
| 3678       | 2,6600                                            | 2,2732      | 0,000   | PREDICTED: tektin-4 [Crassostrea gigas]                                                       | XP_011416098.1 |
| 7957       | 3,0717                                            | 2,6923      | 0,006   | 40S ribosomal protein S4-like [Crassostrea virginica]                                         | XP_022290789.1 |
| 158        | 3,1664                                            | 2,8698      | 0,000   | LOW QUALITY PROTEIN: cilia- and flagella-associated protein 161-like [Crassostrea virginica]  | XP_022332848.1 |
| 169        | 3,0207                                            | 2,5181      | 0,035   | dolichyl-diphosphooligosaccharide-protein glycosyltransferase 48 kDa subunit-like [Mizuhopec  | XP_021367901.1 |
| 107        | 3,2327                                            | 2,9822      | 0,043   | PREDICTED: nucleolin-like partial [Biomphalaria glabrata]                                     | XP_013075907.1 |
| 133        | 2,9688                                            | 2,2429      | 0,002   | PREDICTED: 60S ribosomal protein L22-like [Crassostrea gigas]                                 | XP_011451810.1 |
| 154        | 3,2849                                            | 2,7622      | 0,000   | glutathione S-transferase sigma 2 [Mytilus galloprovincialis]                                 | AFQ35984.1     |
| 110        | 2,9092                                            | 2,5755      | 0,001   | PREDICTED: radixin isoform X3 [Crassostrea gigas]                                             | XP_011453118.1 |
| 141        | 3,2149                                            | 2,1599      | 0,000   | PREDICTED: uncharacterized protein LOC105329621 isoform X2 [Crassostrea gigas]                | XP_011429241.1 |
| 258        | 1,9741                                            | 0,0000      | 0,010   | uncharacterized protein LOC110464458 isoform X12 [Mizuhopecten yessoensis]                    | XP_021375365.1 |

|      |        |        |       |                                                                                        |                |
|------|--------|--------|-------|----------------------------------------------------------------------------------------|----------------|
| 76   | 2,9921 | 2,7453 | 0,025 | histone variant H2A.X [Mytilus galloprovincialis]                                      | AEH58057.1     |
| 147  | 3,2247 | 2,8937 | 0,026 | glutathione S-transferase sigma 3 [Mytilus galloprovincialis]                          | AFQ35985.1     |
| 171  | 3,1081 | 2,8633 | 0,019 | pedal retractor muscle myosin heavy chain partial [Mytilus galloprovincialis]          | CAB64663.1     |
| 151  | 2,4658 | 0,6680 | 0,026 | hypothetical protein HELRODRAFT_108067 partial [Helobdella robusta]                    | XP_009028970.1 |
| 124  | 3,2071 | 2,9931 | 0,005 | RecName: Full=Calmodulin; Short=CaM                                                    | P27166.2       |
| 230  | 3,3076 | 3,0505 | 0,001 | hypothetical protein AM593_04533 partial [Mytilus galloprovincialis]                   | OPL133555.1    |
| 220  | 2,3324 | 2,0789 | 0,002 | T-complex protein 1 subunit eta-like [Crassostrea virginica]                           | XP_022288360.1 |
| 121  | 2,7496 | 2,5490 | 0,026 | filamin-like protein-1 [Mytilus coruscus]                                              | AKS48135.1     |
| 3693 | 1,4823 | 0,0000 | 0,031 | clathrin heavy chain 1 isoform X1 [Mizuhopecten yessoensis]                            | XP_021354511.1 |
| 148  | 3,2640 | 2,9852 | 0,001 | hypothetical protein AM593_00614 partial [Mytilus galloprovincialis]                   | OPL20910.1     |
| 256  | 3,0412 | 2,7527 | 0,003 | 60S ribosomal protein L7-like [Crassostrea virginica]                                  | XP_022339290.1 |
| 44   | 3,4977 | 3,2103 | 0,001 | hypothetical protein HELRODRAFT_186143 [Helobdella robusta]                            | XP_009029528.1 |
| 264  | 2,8252 | 2,5685 | 0,001 | unknown                                                                                |                |
| 197  | 2,8570 | 2,5373 | 0,000 | PREDICTED: enolase-phosphatase E1 [Crassostrea gigas]                                  | XP_011428851.1 |
| 7960 | 2,9838 | 2,6435 | 0,000 | heterogeneous nuclear ribonucleoprotein D-like isoform X3 [Mizuhopecten yessoensis]    | XP_021369725.1 |
| 1149 | 3,4198 | 3,1312 | 0,007 | PREDICTED: centlein [Crassostrea gigas]                                                | XP_019925172.1 |
| 7956 | 3,0254 | 2,8079 | 0,005 | heterogeneous nuclear ribonucleoprotein K-like isoform X7 [Mizuhopecten yessoensis]    | XP_021358952.1 |
| 202  | 3,0430 | 2,7488 | 0,000 | 60S ribosomal protein L23 [Mizuhopecten yessoensis]                                    | XP_021373043.1 |
| 396  | 2,8174 | 2,4655 | 0,000 | TCTP [Mytilus galloprovincialis]                                                       | AEV41412.1     |
| 209  | 2,9780 | 2,6400 | 0,000 | 60S ribosomal protein L9 [Mizuhopecten yessoensis]                                     | OWF37275.1     |
| 89   | 3,0866 | 2,8297 | 0,012 | putative calmodulin variant 1 [Taeniopygia guttata]                                    | ACH46222.1     |
| 307  | 3,3333 | 3,5415 | 0,019 | unknown                                                                                |                |
| 342  | 2,8087 | 2,5753 | 0,001 | tektin-2-like [Crassostrea virginica]                                                  | XP_022314135.1 |
| 255  | 2,9807 | 2,6094 | 0,000 | 60S ribosomal protein L12-like [Crassostrea virginica]                                 | XP_022314628.1 |
| 201  | 3,0852 | 2,4743 | 0,001 | unknown                                                                                |                |
| 176  | 2,7170 | 2,5248 | 0,005 | PREDICTED: 60S ribosomal protein L18-like [Lingula anatina]                            | XP_013398405.1 |
| 206  | 2,9052 | 2,7401 | 0,016 | PREDICTED: guanine nucleotide-binding protein subunit beta [Crassostrea gigas]         | XP_011419294.1 |
| 226  | 3,0508 | 2,8436 | 0,002 | 40S ribosomal protein S26-like [Mizuhopecten yessoensis]                               | XP_021375377.1 |
| 216  | 2,8254 | 2,5486 | 0,002 | glutamate dehydrogenase mitochondrial-like [Crassostrea virginica]                     | XP_022314664.1 |
| 3688 | 2,8692 | 2,5381 | 0,001 | hypothetical protein LOTGIDRAFT_214936 [Lottia gigantea]                               | XP_009053796.1 |
| 205  | 3,0505 | 2,6489 | 0,000 | PREDICTED: 40S ribosomal protein S13 [Crassostrea gigas]                               | XP_011441368.1 |
| 164  | 3,0233 | 2,7728 | 0,001 | PREDICTED: filamin-A isoform X3 [Crassostrea gigas]                                    | XP_019922596.1 |
| 233  | 2,7204 | 2,4949 | 0,006 | PREDICTED: nucleoredoxin [Strongylocentrotus purpuratus]                               | XP_011682183.1 |
| 368  | 2,7200 | 2,6087 | 0,027 | T-complex protein 1 subunit beta-like [Crassostrea virginica]                          | XP_022286485.1 |
| 159  | 2,7381 | 2,4235 | 0,004 | 60S ribosomal protein L7a-like [Mizuhopecten yessoensis]                               | XP_021369622.1 |
| 211  | 2,7897 | 2,4614 | 0,006 | calmodulin-like isoform X1 [Crassostrea virginica]                                     | XP_022303657.1 |
| 217  | 2,5650 | 2,3167 | 0,004 | insulin-like growth factor 2 mRNA-binding protein 2 isoform X1 [Crassostrea virginica] | XP_022305782.1 |
| 3692 | 2,9455 | 2,7034 | 0,001 | 60S ribosomal protein L10-like [Crassostrea virginica]                                 | XP_022315909.1 |
| 235  | 2,5877 | 2,3636 | 0,010 | PREDICTED: alcohol dehydrogenase class-3-like [Lingula anatina]                        | XP_013411149.1 |
| 186  | 3,0129 | 2,7163 | 0,002 | PREDICTED: enolase-like [Crassostrea gigas]                                            | XP_011436228.1 |
| 168  | 2,7762 | 2,4933 | 0,025 | eukaryotic initiation factor 4A-I-like [Crassostrea virginica]                         | XP_022288944.1 |
| 117  | 2,5597 | 2,3111 | 0,012 | LOW QUALITY PROTEIN: annexin A4-like [Crassostrea virginica]                           | XP_022316814.1 |
| 260  | 2,5457 | 2,1316 | 0,001 | cytochrome c oxidase subunit IV partial [Mytilus edulis]                               | ACA23124.1     |
| 104  | 2,6860 | 2,3371 | 0,001 | Ras-related protein Rab-1A [Haliotis discus discus]                                    | ABO26625.1     |
| 251  | 2,5156 | 2,1923 | 0,001 | PREDICTED: protein disulfide-isomerase A6 [Crassostrea gigas]                          | XP_011446200.1 |
| 5888 | 2,4391 | 2,2288 | 0,006 | testis-specific gene 10 protein-like isoform X2 [Mizuhopecten yessoensis]              | XP_021348266.1 |
| 155  | 2,6237 | 2,1962 | 0,000 | PREDICTED: nucleoside diphosphate kinase A [Crassostrea gigas]                         | XP_011449577.1 |
| 227  | 2,4564 | 1,4509 | 0,048 | PREDICTED: cilia- and flagella-associated protein 52 [Crassostrea gigas]               | XP_011416101.1 |
| 59   | 2,4320 | 2,1272 | 0,010 | RecName: Full=Histone H2A                                                              | Q6WV66.3       |
| 297  | 2,4459 | 2,1472 | 0,001 | PREDICTED: limbin-like isoform X2 [Crassostrea gigas]                                  | XP_011443052.1 |
| 7955 | 3,0369 | 2,8432 | 0,038 | LKD-rich protein-1 [Mytilus galloprovincialis]                                         | AKS48185.1     |
| 3689 | 2,7744 | 2,5032 | 0,002 | pyruvate kinase PKM-like isoform X6 [Crassostrea virginica]                            | XP_022311729.1 |
| 271  | 2,7173 | 2,3857 | 0,002 | hypothetical protein AM593_10055 partial [Mytilus galloprovincialis]                   | OPL21226.1     |
| 7958 | 2,5175 | 2,2083 | 0,005 | PREDICTED: aspartate aminotransferase cytoplasmic [Crassostrea gigas]                  | XP_011430094.1 |
| 244  | 2,4733 | 2,1115 | 0,002 | ras [Mytilus edulis]                                                                   | AAT81171.1     |
| 214  | 2,5957 | 2,3405 | 0,044 | 6-phosphogluconate dehydrogenase decarboxylating-like [Crassostrea virginica]          | XP_022343934.1 |
| 231  | 2,5772 | 2,2819 | 0,000 | PREDICTED: cytosolic non-specific dipeptidase isoform X1 [Crassostrea gigas]           | XP_019928389.1 |
| 222  | 2,5655 | 2,1826 | 0,000 | annexin B9-like [Crassostrea virginica]                                                | XP_022317867.1 |
| 263  | 2,7963 | 2,5108 | 0,016 | major vault protein-like [Crassostrea virginica]                                       | XP_022342755.1 |
| 268  | 2,8869 | 2,6757 | 0,003 | 14-3-3 protein homolog 2-like [Crassostrea virginica]                                  | XP_022343021.1 |
| 5863 | 2,4225 | 0,8739 | 0,032 | PREDICTED: transketolase-like protein 2 isoform X1 [Crassostrea gigas]                 | XP_011427761.1 |
| 131  | 2,5675 | 1,8677 | 0,001 | 60S ribosomal protein L10a-2-like [Mizuhopecten yessoensis]                            | XP_021379854.1 |
| 312  | 2,8012 | 2,6169 | 0,020 | PREDICTED: troponin T-like [Biomphalaria glabrata]                                     | XP_013095195.1 |
| 5871 | 2,4403 | 1,7548 | 0,011 | radial spoke head protein 4 homolog A-like [Mizuhopecten yessoensis]                   | XP_021370563.1 |
| 85   | 2,9117 | 2,6880 | 0,022 | filamin-like protein-3 partial [Mytilus coruscus]                                      | AKS48150.1     |
| 3694 | 2,3432 | 1,6698 | 0,008 | radial spoke head protein 9 homolog [Mizuhopecten yessoensis]                          | XP_021363337.1 |

*Table S2: Relative abundance values of proteins differentially expressed between control and group exposed to compound 23, and statistical results (mixed model ANOVA, P-value <0.05)*

| Protein ID | Mean of log <sub>10</sub> (x+1)-transformed values |             | P-value (a) | protein description                                                                                    | Accession      |
|------------|----------------------------------------------------|-------------|-------------|--------------------------------------------------------------------------------------------------------|----------------|
|            | Control                                            | compound 23 |             |                                                                                                        |                |
| 48         | 3,545820403                                        | 3,12534832  | 0,000       | ribosomal protein [Mytilus galloprovincialis]                                                          | CAQ63458.1     |
| 220        | 2,332414357                                        | 2,115023251 | 0,000       | T-complex protein 1 subunit eta-like [Crassostrea virginica]                                           | XP_022288360.1 |
| 75         | 3,345207927                                        | 3,056096356 | 0,000       | PREDICTED: adenosylhomocysteinase A [Crassostrea gigas]                                                | XP_011412005.1 |
| 151        | 2,465766659                                        | 0           | 0,000       | hypothetical protein HELRODRAFT_108067 partial [Helobdella robusta]                                    | XP_009028970.1 |
| 200        | 3,063263125                                        | 2,893022785 | 0,000       | uncharacterized protein LOC111111285 isoform X1 [Crassostrea virginica]                                | XP_022303867.1 |
| 14         | 3,83764251                                         | 3,605742532 | 0,000       | procollagen-proline dioxygenase beta subunit [Mytilus galloprovincialis]                               | AFM30917.1     |
| 128        | 3,34871817                                         | 3,075801472 | 0,001       | cathepsin D [Pteris penguin]                                                                           | AEI58895.1     |
| 147        | 3,224718342                                        | 2,737205761 | 0,001       | glutathione S-transferase sigma 3 [Mytilus galloprovincialis]                                          | AFQ35985.1     |
| 312        | 2,801211375                                        | 2,469386138 | 0,001       | PREDICTED: troponin T-like [Biomphalaria glabrata]                                                     | XP_013095195.1 |
| 124        | 3,207143385                                        | 3,00324297  | 0,001       | RecName: Full=Calmodulin; Short=CaM                                                                    | P27166.2       |
| 93         | 3,541707496                                        | 3,228150096 | 0,001       | PREDICTED: calreticulin-like [Lingula anatina]                                                         | XP_013397065.1 |
| 396        | 2,817361952                                        | 2,54494681  | 0,001       | TCTP [Mytilus galloprovincialis]                                                                       | AEV41412.1     |
| 204        | 3,233751495                                        | 2,998238284 | 0,001       | PREDICTED: 40S ribosomal protein SA [Crassostrea gigas]                                                | XP_011438171.1 |
| 123        | 3,625407615                                        | 3,445274517 | 0,002       | ubiquitin-40S ribosomal protein S27a [Crassostrea gigas]                                               | NP_001292281.1 |
| 209        | 2,977999002                                        | 2,756523602 | 0,002       | 60S ribosomal protein L9 [Mizuhopecten yessoensis]                                                     | OWF37275.1     |
| 39         | 3,515027408                                        | 3,273928967 | 0,002       | uncharacterized protein LOC111107057 isoform X2 [Crassostrea virginica]                                | XP_022297716.1 |
| 164        | 3,023345072                                        | 2,790851915 | 0,002       | PREDICTED: filamin-A isoform X3 [Crassostrea gigas]                                                    | XP_019922596.1 |
| 7957       | 3,071678554                                        | 2,708424086 | 0,002       | 40S ribosomal protein S4-like [Crassostrea virginica]                                                  | XP_022290789.1 |
| 19         | 3,742052665                                        | 3,5100083   | 0,002       | ATP synthase subunit beta mitochondrial [Mizuhopecten yessoensis]                                      | XP_021356377.1 |
| 211        | 2,789723988                                        | 2,370858204 | 0,002       | calmodulin-like isoform X1 [Crassostrea virginica]                                                     | XP_022303657.1 |
| 71         | 2,990050751                                        | 2,725199804 | 0,002       | dolichyl-diphosphooligosaccharide-protein glycosyltransferase subunit 1-like [Mizuhopecten yessoensis] | XP_021341263.1 |

|      |             |             |       |                                                                                              |                |
|------|-------------|-------------|-------|----------------------------------------------------------------------------------------------|----------------|
| 118  | 3,499157843 | 3,248432026 | 0,003 | cytosolic malate dehydrogenase [Mytilus galloprovincialis]                                   | AAZ79367.1     |
| 11   | 4,309132629 | 4,113950451 | 0,003 | RecName: Full=Tropomyosin                                                                    | QZ5457.1       |
| 116  | 3,680084414 | 3,459045841 | 0,003 | meprin A subunit alpha-like [Mizuhopecten yessoensis]                                        | XP_021356192.1 |
| 64   | 3,700154371 | 3,452822857 | 0,003 | meprin A subunit alpha-like [Mizuhopecten yessoensis]                                        | XP_021356192.1 |
| 95   | 4,203265567 | 4,025946156 | 0,003 | histone H1 [Venerupis corrugata]                                                             | ABV25915.1     |
| 152  | 3,332009681 | 3,112969466 | 0,003 | PREDICTED: 40S ribosomal protein S3 [Crassostrea gigas]                                      | XP_011438308.1 |
| 154  | 3,284865997 | 2,976084697 | 0,003 | glutathione S-transferase sigma 2 [Mytilus galloprovincialis]                                | AFQ35984.1     |
| 143  | 2,983821018 | 2,850487771 | 0,003 | 40S ribosomal protein S25-like [Mizuhopecten yessoensis]                                     | XP_021370373.1 |
| 216  | 2,825359561 | 2,536664209 | 0,003 | glutamate dehydrogenase mitochondrial-like [Crassostrea virginica]                           | XP_022314664.1 |
| 107  | 3,232661416 | 3,009390822 | 0,003 | PREDICTED: nucleolin-like partial [Biomphalaria glabrata]                                    | XP_013075907.1 |
| 104  | 2,686042679 | 2,428289828 | 0,003 | Ras-related protein Rab-1A [Haliotis discus discus]                                          | ABO26625.1     |
| 121  | 2,749600201 | 2,525639385 | 0,003 | filamin-like protein-1 [Mytilus coruscus]                                                    | AKS48135.1     |
| 101  | 3,267113764 | 3,060893175 | 0,003 | lamin Dm0-like [Mizuhopecten yessoensis]                                                     | XP_021357386.1 |
| 18   | 3,783148688 | 3,583237842 | 0,003 | mitochondrial H+ ATPase a subunit [Pinctada fucata]                                          | ABJ51956.1     |
| 7    | 4,386337293 | 4,161511387 | 0,003 | PREDICTED: tubulin beta chain [Priapulus caudatus]                                           | XP_014664190.1 |
| 7960 | 2,983821018 | 2,703736298 | 0,003 | heterogeneous nuclear ribonucleoprotein D-like isoform X3 [Mizuhopecten yessoensis]          | XP_021369725.1 |
| 92   | 3,667347121 | 3,408954738 | 0,003 | voltage-dependent anion channel 2-like protein [Haliotis diversicolor]                       | ADJ56517.1     |
| 160  | 3,287916402 | 3,061218026 | 0,003 | PREDICTED: protein SET [Crassostrea gigas]                                                   | XP_011443579.1 |
| 156  | 3,010691413 | 2,820181491 | 0,003 | PREDICTED: major vault protein [Crassostrea gigas]                                           | XP_011432755.1 |
| 51   | 4,011009496 | 3,768665654 | 0,004 | arginine kinase-like protein-1 [Mytilus coruscus]                                            | AKS48144.1     |
| 34   | 3,719836167 | 3,465417116 | 0,004 | pedal retractor muscle myosin heavy chain partial [Mytilus galloprovincialis]                | CAB64663.1     |
| 91   | 3,490803585 | 3,195927616 | 0,004 | 40S ribosomal protein S14 [Mizuhopecten yessoensis]                                          | XP_021365459.1 |
| 255  | 2,980681499 | 2,752204267 | 0,004 | 60S ribosomal protein L12-like [Crassostrea virginica]                                       | XP_022314628.1 |
| 106  | 3,424376599 | 3,176929458 | 0,004 | hypothetical protein LOTGIDRAFT_235900 [Lottia gigantea]                                     | XP_009064140.1 |
| 2    | 4,608357188 | 4,331231822 | 0,004 | beta-actin [Meretrix meretrix]                                                               | AEK81538.1     |
| 23   | 3,522644814 | 3,253016622 | 0,004 | byssal HSP-like protein 1 [Mytilus coruscus]                                                 | ANN45953.1     |
| 66   | 3,400147735 | 3,24873257  | 0,004 | uncharacterized protein LOC11134038 isoform X1 [Crassostrea virginica]                       | XP_022338516.1 |
| 277  | 3,618155895 | 3,353228755 | 0,004 | PREDICTED: cilia- and flagella-associated protein 52 [Crassostrea gigas]                     | XP_011416101.1 |
| 82   | 3,56516495  | 3,338983112 | 0,004 | elongation factor 2-like [Crassostrea virginica]                                             | XP_022335104.1 |
| 109  | 3,271415559 | 3,068852017 | 0,004 | RNA-binding protein [Pinctada fucata]                                                        | ABP04054.1     |
| 3678 | 2,660018778 | 2,383571891 | 0,004 | PREDICTED: tektin-4 [Crassostrea gigas]                                                      | XP_011416098.1 |
| 21   | 3,578521812 | 3,322667625 | 0,004 | heat shock protein 90 [Mytilus galloprovincialis]                                            | CAJ85741.1     |
| 3    | 4,156373944 | 4,010703168 | 0,005 | actin adductor muscle [Crassostrea virginica]                                                | XP_022325998.1 |
| 176  | 2,717024295 | 2,476587647 | 0,005 | PREDICTED: 60S ribosomal protein L18-like [Lingula anatina]                                  | XP_013398405.1 |
| 100  | 3,23199652  | 2,965995553 | 0,005 | elongation factor 1-gamma-like [Crassostrea virginica]                                       | XP_022332183.1 |
| 158  | 3,166385086 | 2,973392825 | 0,005 | LOW QUALITY PROTEIN: cilia- and flagella-associated protein 161-like [Crassostrea virginica] | XP_022332848.1 |
| 202  | 3,043023332 | 2,836147023 | 0,005 | 60S ribosomal protein L23 [Mizuhopecten yessoensis]                                          | XP_021373043.1 |
| 3688 | 2,869157615 | 2,61767721  | 0,005 | hypothetical protein LOTGIDRAFT_214936 [Lottia gigantea]                                     | XP_009053796.1 |
| 55   | 3,434052278 | 3,15028305  | 0,005 | ribosomal protein S8e partial [Mytilus trossulus]                                            | ALX27203.1     |
| 10   | 3,442643459 | 3,231196414 | 0,005 | filamin-like protein-1 [Mytilus coruscus]                                                    | AKS48135.1     |
| 122  | 3,842354494 | 3,616537791 | 0,005 | cyclophilin A isoform 2 [Ruditapes philippinarum]                                            | ACU83230.1     |
| 162  | 2,804256103 | 2,590340589 | 0,005 | uncharacterized protein LOC110465734 isoform X2 [Mizuhopecten yessoensis]                    | XP_021377443.1 |
| 119  | 3,206300065 | 2,925458855 | 0,005 | Phosphoenolpyruvate carboxykinase [GTP] [Crassostrea gigas]                                  | EKC27095.1     |
| 3689 | 2,774369561 | 2,540129165 | 0,005 | pyruvate kinase PKM-like isoform X6 [Crassostrea virginica]                                  | XP_022311729.1 |
| 24   | 3,632923283 | 3,395332457 | 0,005 | heat shock cognate 71 [Mytilus galloprovincialis]                                            | CAH04109.1     |
| 250  | 2,827231292 | 2,596015272 | 0,005 | triosephosphate isomerase-like [Crassostrea virginica]                                       | XP_022336561.1 |
| 197  | 2,856985484 | 2,639983825 | 0,006 | PREDICTED: enolase-phosphatase E1 [Crassostrea gigas]                                        | XP_011428851.1 |
| 52   | 4,961802114 | 4,698221583 | 0,006 | PREDICTED: histone H4 [Equus caballus]                                                       | XP_014590042.1 |
| 3681 | 3,17637219  | 2,982573632 | 0,006 | unknown                                                                                      |                |
| 7956 | 3,025394087 | 2,823155779 | 0,006 | heterogeneous nuclear ribonucleoprotein K-like isoform X7 [Mizuhopecten yessoensis]          | XP_021358952.1 |
| 305  | 2,573678629 | 2,324506715 | 0,006 | centrosome-associated protein 350-like isoform X1 [Mizuhopecten yessoensis]                  | XP_021341745.1 |
| 20   | 3,502750242 | 3,293095048 | 0,007 | sodium/potassium-transporting ATPase subunit alpha-like [Crassostrea virginica]              | XP_022323941.1 |
| 77   | 3,344192149 | 3,110542141 | 0,007 | PREDICTED: plastin-3 [Crassostrea gigas]                                                     | XP_011415779.2 |
| 87   | 3,055405599 | 2,831648317 | 0,007 | adenyllyl cyclase-associated protein 1-like isoform X3 [Crassostrea virginica]               | XP_022334187.1 |
| 214  | 2,595710721 | 2,248472079 | 0,007 | 6-phosphogluconate dehydrogenase decarboxylating-like [Crassostrea virginica]                | XP_022343934.1 |
| 3687 | 2,536499433 | 2,175207381 | 0,007 | hypothetical protein LOTGIDRAFT_187321 [Lottia gigantea]                                     | XP_009050935.1 |
| 5    | 3,823973507 | 3,623290062 | 0,007 | pedal retractor muscle myosin heavy chain partial [Mytilus galloprovincialis]                | CAB64663.1     |
| 56   | 2,629261884 | 2,947746249 | 0,007 | myosin heavy chain non-muscle-like isoform X4 [Mizuhopecten yessoensis]                      | XP_021335092.1 |
| 231  | 2,577154658 | 2,369180242 | 0,007 | PREDICTED: cytosolic non-specific dipeptidase isoform X1 [Crassostrea gigas]                 | XP_019928389.1 |
| 7958 | 2,517463899 | 2,266455214 | 0,007 | PREDICTED: aspartate aminotransferase cytoplasmic [Crassostrea gigas]                        | XP_011430094.1 |
| 264  | 2,825249311 | 2,641177745 | 0,007 | unknown                                                                                      |                |
| 186  | 3,012938137 | 2,794362418 | 0,008 | PREDICTED: enolase-like [Crassostrea gigas]                                                  | XP_011436228.1 |
| 661  | 3,157541051 | 2,925461753 | 0,008 | hypothetical protein KP79_PYT11668 [Mizuhopecten yessoensis]                                 | OWF55888.1     |
| 138  | 3,268109035 | 3,051029842 | 0,008 | hypothetical protein AM593_06933 partial [Mytilus galloprovincialis]                         | OPL33400.1     |
| 205  | 3,050502734 | 2,821032635 | 0,008 | PREDICTED: 40S ribosomal protein S13 [Crassostrea gigas]                                     | XP_011441368.1 |
| 70   | 3,283349288 | 3,051638549 | 0,008 | aldehyde dehydrogenase mitochondrial-like [Mizuhopecten yessoensis]                          | XP_021346041.1 |
| 74   | 3,420666821 | 3,219288181 | 0,008 | fructose-bisphosphate aldolase-like [Crassostrea virginica]                                  | XP_022340550.1 |
| 30   | 4,144743792 | 3,943383122 | 0,008 | elongation factor 1 alpha [Mytilus galloprovincialis]                                        | BAD35019.1     |
| 103  | 3,726238911 | 3,491007989 | 0,009 | mammalian ependymin-related protein 1-like [Mizuhopecten yessoensis]                         | XP_021339375.1 |
| 244  | 2,473319478 | 2,185610261 | 0,009 | ras [Mytilus edulis]                                                                         | AAT81171.1     |
| 35   | 3,813745702 | 3,559079375 | 0,009 | glyceraldehyde-3-phosphate dehydrogenase partial [Mytilus galloprovincialis]                 | AIK22450.1     |
| 3692 | 2,945486676 | 2,718155921 | 0,009 | 60S ribosomal protein L10-like [Crassostrea virginica]                                       | XP_022315909.1 |
| 40   | 3,435168894 | 3,232487305 | 0,009 | PREDICTED: alpha-actinin sarcomeric isoform X2 [Crassostrea gigas]                           | XP_011425356.1 |
| 230  | 3,30764614  | 3,124902897 | 0,009 | hypothetical protein AM593_04533 partial [Mytilus galloprovincialis]                         | OPL33555.1     |
| 61   | 4,739270666 | 4,496380037 | 0,009 | histone H2B [Mytilus edulis]                                                                 | CAD37816.1     |
| 131  | 2,576491164 | 2,155544421 | 0,009 | 60S ribosomal protein L10a-2-like [Mizuhopecten yessoensis]                                  | XP_021379854.1 |
| 57   | 3,314710065 | 3,018562514 | 0,009 | PREDICTED: tektin-3-like isoform X1 [Crassostrea gigas]                                      | XP_011450983.1 |
| 168  | 2,776191705 | 2,491219533 | 0,009 | eukaryotic initiation factor 4A-1-like [Crassostrea virginica]                               | XP_022288944.1 |
| 251  | 2,515581532 | 2,250862418 | 0,010 | PREDICTED: protein disulfide-isomerase A6 [Crassostrea gigas]                                | XP_011446200.1 |
| 42   | 3,854636586 | 3,682162944 | 0,010 | PREDICTED: 14-3-3 protein zeta isoform X1 [Hyalella azteca]                                  | XP_018019106.1 |
| 159  | 2,738066745 | 2,428038805 | 0,010 | 60S ribosomal protein L7a-like [Mizuhopecten yessoensis]                                     | XP_021369622.1 |
| 89   | 3,086601511 | 2,893283642 | 0,010 | putative calmodulin variant 1 [Taeniopygia guttata]                                          | ACH46222.1     |
| 54   | 3,455775518 | 3,17412769  | 0,011 | isocitrate dehydrogenase [Mytilus galloprovincialis]                                         | AFI56365.1     |
| 226  | 3,050841993 | 2,853249747 | 0,011 | 40S ribosomal protein S26-like [Mizuhopecten yessoensis]                                     | XP_021375377.1 |
| 141  | 3,214948241 | 2,638804997 | 0,011 | PREDICTED: uncharacterized protein LOC105329621 isoform X2 [Crassostrea gigas]               | XP_011429241.1 |
| 297  | 2,445944845 | 2,170092336 | 0,011 | PREDICTED: limbin-like isoform X2 [Crassostrea gigas]                                        | XP_011443052.1 |
| 67   | 3,979066934 | 3,763014465 | 0,012 | histone H2A.Z.2 [Mytilus galloprovincialis]                                                  | APR72375.1     |

|      |             |             |       |                                                                                                             |                |
|------|-------------|-------------|-------|-------------------------------------------------------------------------------------------------------------|----------------|
| 171  | 3,108084961 | 2,872964259 | 0,012 | pedal retractor muscle myosin heavy chain partial [Mytilus galloprovincialis]                               | CAB64663.1     |
| 290  | 3,597978116 | 3,986360585 | 0,012 | multidrug resistance-associated protein 5-like [Crassostrea virginica]                                      | XP_022324434.1 |
| 7955 | 3,036888247 | 2,769293038 | 0,012 | LKD-rich protein-1 [Mytilus galloprovincialis]                                                              | AKS48185.1     |
| 256  | 3,0412126   | 2,731814666 | 0,012 | 60S ribosomal protein L7-like [Crassostrea virginica]                                                       | XP_022339290.1 |
| 50   | 3,4593682   | 3,207952064 | 0,013 | PREDICTED: 14-3-3 protein epsilon isoform X1 [Ictalurus punctatus]                                          | AAF27650.1     |
| 132  | 3,401788602 | 3,182253001 | 0,013 | malate dehydrogenase precursor [Nucella lapillus]                                                           | XP_011453118.1 |
| 110  | 2,909183169 | 2,667474306 | 0,013 | PREDICTED: radixin isoform X3 [Crassostrea gigas]                                                           | OPL20910.1     |
| 148  | 3,264003471 | 3,054397116 | 0,013 | hypothetical protein AM593_00614 partial [Mytilus galloprovincialis]                                        | XP_021364413.1 |
| 114  | 3,49538502  | 3,264693653 | 0,014 | uncharacterized protein LOC110457451 isoform X2 [Mizuhopecten yessoensis]                                   | No_Hits        |
| 201  | 3,085176892 | 2,825275593 | 0,014 | unknown                                                                                                     | XP_022331028.1 |
| 3680 | 2,971967263 | 2,746192082 | 0,014 | probable methylmalonate-semialdehyde dehydrogenase [acylating] mitochondrial [Crassostrea virginica]        | KFB49247.1     |
| 49   | 3,756631422 | 3,544568849 | 0,014 | myosin heavy chain isoform N [Anopheles sinensis]                                                           | XP_021370666.1 |
| 12   | 3,857270689 | 3,626956434 | 0,015 | tubulin alpha-1A chain [Mizuhopecten yessoensis]                                                            | XP_022343021.1 |
| 268  | 2,886887969 | 2,682676468 | 0,015 | 14-3-3 protein homolog 2-like [Crassostrea virginica]                                                       | AEH58057.1     |
| 76   | 2,992121234 | 2,770492849 | 0,015 | histone variant H2A.X [Mytilus galloprovincialis]                                                           | XP_011444269.1 |
| 137  | 3,474746041 | 3,147817508 | 0,015 | PREDICTED: peptidyl-prolyl cis-trans isomerase [Crassostrea gigas]                                          | XP_011682183.1 |
| 233  | 2,720369268 | 2,505415611 | 0,015 | PREDICTED: nucleoredoxin [Strongylocentrotus purpuratus]                                                    | AKS48140.1     |
| 99   | 3,126761993 | 2,899738829 | 0,016 | twitchin-like protein-1 [Mytilus coruscus]                                                                  | XP_021361554.1 |
| 105  | 3,064106025 | 2,735584039 | 0,016 | flotillin-1-like isoform X1 [Mizuhopecten yessoensis]                                                       | XP_013068480.1 |
| 113  | 3,292454202 | 3,080518443 | 0,016 | PREDICTED: 60S ribosomal protein L11 [Biomphalaria glabrata]                                                | XP_021367901.1 |
| 169  | 3,020716799 | 2,388227171 | 0,017 | dolichyl-diphosphooligosaccharide-protein glycosyltransferase 48 kDa subunit-like [Mizuhopecten yessoensis] | OPL21226.1     |
| 271  | 2,717329052 | 2,430972595 | 0,018 | hypothetical protein AM593_10055 partial [Mytilus galloprovincialis]                                        | ACA23124.1     |
| 260  | 2,545741083 | 2,309469002 | 0,018 | cytochrome c oxidase subunit IV partial [Mytilus edulis]                                                    | XP_022317867.1 |
| 222  | 2,565493834 | 2,327268004 | 0,019 | annexin B9-like [Crassostrea virginica]                                                                     | BAB17763.1     |
| 161  | 2,620104329 | 2,352810492 | 0,021 | twitchin partial [Mytilus galloprovincialis]                                                                | AEP02967.1     |
| 111  | 3,193063225 | 3,003300028 | 0,022 | small heat shock protein 22 [Mytilus galloprovincialis]                                                     | XP_022318647.1 |
| 7964 | 2,839162383 | 2,517217332 | 0,023 | trichohyalin-like isoform X4 [Crassostrea virginica]                                                        | BAB60813.1     |
| 15   | 4,294007307 | 4,082692656 | 0,023 | calponin-like protein [Mytilus galloprovincialis]                                                           | XP_022286485.1 |
| 368  | 2,720025856 | 2,589036733 | 0,023 | T-complex protein 1 subunit beta-like [Crassostrea virginica]                                               | XP_012945445.1 |
| 225  | 1,968699847 | 0           | 0,024 | PREDICTED: heterogeneous nuclear ribonucleoprotein 87F-like isoform X3 [Aplysia californica]                | XP_022314135.1 |
| 342  | 2,808698205 | 2,648177703 | 0,025 | tektin-2-like [Crassostrea virginica]                                                                       | XP_019925172.1 |
| 1149 | 3,419776302 | 3,146196286 | 0,026 | PREDICTED: centlein [Crassostrea gigas]                                                                     | XP_013411149.1 |
| 235  | 2,587665791 | 2,433906158 | 0,026 | PREDICTED: alcohol dehydrogenase class-3-like [Lingula anatina]                                             | XP_022329914.1 |
| 26   | 3,521384225 | 3,314636334 | 0,026 | protein disulfide-isomerase A3-like [Crassostrea virginica]                                                 | XP_022316814.1 |
| 117  | 2,559659846 | 2,323211355 | 0,026 | LOW QUALITY PROTEIN: annexin A4-like [Crassostrea virginica]                                                | XP_022335676.1 |
| 249  | 3,162984532 | 3,002267821 | 0,028 | uncharacterized protein ZK1073.1-like isoform X4 [Crassostrea virginica]                                    | BAC00784.1     |
| 102  | 2,963224744 | 2,738570733 | 0,028 | twitchin [Mytilus galloprovincialis]                                                                        | XP_011416101.1 |
| 227  | 2,45641341  | 2,284274011 | 0,028 | PREDICTED: cilia- and flagella-associated protein 52 [Crassostrea gigas]                                    | XP_009029528.1 |
| 44   | 3,497746166 | 3,336378797 | 0,028 | hypothetical protein HELRODRAFT_186143 [Helobdella robusta]                                                 | XP_022305782.1 |
| 217  | 2,565041916 | 2,379855841 | 0,029 | insulin-like growth factor 2 mRNA-binding protein 2 isoform X1 [Crassostrea virginica]                      | No_Hits        |
| 307  | 3,333337048 | 3,545860356 | 0,035 | No_Hits                                                                                                     | XP_011417460.1 |
| 252  | 2,597587435 | 1,80007368  | 0,035 | PREDICTED: villin-1 isoform X1 [Crassostrea gigas]                                                          | XP_021357329.1 |
| 90   | 3,241577044 | 2,928062732 | 0,035 | citrate synthase mitochondrial-like [Mizuhopecten yessoensis]                                               | AKS48133.1     |
| 27   | 3,511154726 | 3,378470728 | 0,036 | filament-like protein-2 [Mytilus coruscus]                                                                  | XP_021375365.1 |
| 258  | 1,974097387 | 0           | 0,037 | uncharacterized protein LOC110464458 isoform X12 [Mizuhopecten yessoensis]                                  | No_Hits        |
| 144  | 3,876583641 | 3,630314254 | 0,037 | No_Hits                                                                                                     | XP_021348266.1 |
| 5888 | 2,439054532 | 2,261881695 | 0,038 | testis-specific gene 10 protein-like isoform X2 [Mizuhopecten yessoensis]                                   | OWF45664.1     |
| 229  | 2,513041968 | 2,363350566 | 0,040 | Lethal(2) giant larvae protein-like 1 [Mizuhopecten yessoensis]                                             | XP_021354511.1 |
| 3693 | 1,482260274 | 0           | 0,043 | clathrin heavy chain 1 isoform X1 [Mizuhopecten yessoensis]                                                 | XP_022320110.1 |
| 9    | 4,241189316 | 4,086966549 | 0,048 | retrograde protein of 51 kDa-like isoform X4 [Crassostrea virginica]                                        | XP_022332780.1 |
| 25   | 0           | 1,28591816  | 0,049 | tropomyosin isoform X9 [Crassostrea virginica]                                                              |                |

*Table S3: Functional analysis and enrichment of differentially expressed proteins identified in mussel plantigrade larvae. Only the GO category Biological Process is represented in the analysis. GO = gene ontology term; term\_size = number of gene sequences related to the GO term in the database; effective\_domain\_size = total number of gene sequences in the database.*

| term_name                                               | term_id    | term_size | effective_domain_size | adjusted_p_value_XA21 | query_size_XA21 | intersection_size_XA21 | adjusted_p_value_XA23 | query_size_XA23 | intersection_size_XA23 |
|---------------------------------------------------------|------------|-----------|-----------------------|-----------------------|-----------------|------------------------|-----------------------|-----------------|------------------------|
| organonitrogen compound biosynthetic process            | GO:1901566 | 629       | 8980                  | 1.17856E-05           | 70              | 20                     | 8.93813E-06           | 69              | 20                     |
| translation                                             | GO:0006412 | 292       | 8980                  | 0.000741043           | 70              | 12                     | 8.80207E-05           | 69              | 13                     |
| peptide biosynthetic process                            | GO:0043043 | 300       | 8980                  | 0.00098223            | 70              | 12                     | 0.000120158           | 69              | 13                     |
| amide biosynthetic process                              | GO:0043604 | 312       | 8980                  | 0.001474339           | 70              | 12                     | 0.000388239           | 69              | 13                     |
| peptide metabolic process                               | GO:0006518 | 319       | 8980                  | 0.001852446           | 70              | 12                     | 0.000242306           | 69              | 13                     |
| cellular amide metabolic process                        | GO:0043603 | 358       | 8980                  | 0.005961851           | 70              | 12                     | 0.000884403           | 69              | 13                     |
| small molecule metabolic process                        | GO:0044281 | 526       | 8980                  | 0.0006609304          | 70              | 16                     | 0.002609155           | 69              | 15                     |
| cellular component biogenesis                           | GO:0044085 | 349       | 8980                  | 0.024340054           | 70              | 11                     | 0.003936325           | 69              | 12                     |
| cilium movement involved in cell motility               | GO:0060294 | 10        | 8980                  | 0.000231887           | 70              | 4                      | 0.016823585           | 69              | 3                      |
| cilium-dependent cell motility                          | GO:0060285 | 11        | 8980                  | 0.000362252           | 70              | 4                      | 0.023005128           | 69              | 3                      |
| cilium or flagellum-dependent cell motility             | GO:001339  | 13        | 8980                  | 0.000775683           | 70              | 4                      | 0.039438064           | 69              | 3                      |
| purine ribonucleoside triphosphate metabolic process    | GO:0009205 | 17        | 8980                  | 0.000521873           | 70              | 4                      | 0.09172431            | 69              | 3                      |
| purine ribonucleoside triphosphate biosynthetic process | GO:0009206 | 17        | 8980                  | 0.002521873           | 70              | 4                      | 0.09172431            | 69              | 3                      |
| purine nucleoside triphosphate metabolic process        | GO:0009144 | 17        | 8980                  | 0.002521873           | 70              | 4                      | 0.09172431            | 69              | 3                      |
| purine nucleoside triphosphate biosynthetic process     | GO:0009145 | 17        | 8980                  | 0.002521873           | 70              | 4                      | 0.09172431            | 69              | 3                      |
| cilium movement                                         | GO:0003341 | 18        | 8980                  | 0.003223374           | 70              | 4                      | 0.109464658           | 69              | 3                      |
| ribonucleoside triphosphate metabolic process           | GO:0009199 | 19        | 8980                  | 0.004058976           | 70              | 4                      | 0.129275572           | 69              | 3                      |
| nucleoside triphosphate biosynthetic process            | GO:0009142 | 19        | 8980                  | 0.004058976           | 70              | 4                      | 0.129275572           | 69              | 3                      |
| ribonucleoside triphosphate biosynthetic process        | GO:0009201 | 19        | 8980                  | 0.004058976           | 70              | 4                      | 0.129275572           | 69              | 3                      |
